# Supplementary material for: New quaternary chalcogenide Ba4HgAs2S10originating from the combination of linear [HgS2]2−and tetrahedral [AsS4]3−modules
Source: Royal Society of Chemistry journal article supplement (doi:10.1039/d0dt02781b), 2020-01-01
Supplement: d0dt02781b1.pdf [file d0dt02781b1.pdf]

## **New quaternary chalcogenide $\text{Ba}_4\text{HgAs}_2\text{S}_{10}$ originating from the combination of linear $[\text{HgS}_2]^{2-}$ and tetrahedral $[\text{AsS}_4]^{3-}$ modules**

Wenhao Xing,<sup>a, b, c, d</sup> Naizheng Wang,<sup>a, c</sup> Zhuang Li,<sup>a, c</sup> Wenhao Liu,<sup>a</sup> Jian Tang,<sup>b, d</sup> Wenlong Yin,<sup>b, d\*</sup> Zheshuai Lin,<sup>a</sup> Bin Kang,<sup>b, d</sup> and Jiyong Yao<sup>a\*</sup>

<sup>a</sup> Beijing Center for Crystal Research and Development, Key Lab of Functional Crystals and Laser Technology, Technical Institute of Physics and Chemistry, Chinese Academy of Sciences, Beijing 100190, P. R. China, corresponding author: Jiyong Yao, E-mail: [jyao@mail.ipc.ac.cn](mailto:jyao@mail.ipc.ac.cn).

<sup>b</sup> Institute of Chemical Materials, China Academy of Engineering Physics, Mianyang 621900, People's Republic of China. corresponding author: Wenlong Yin, E-mail: [wlyin@caep.cn](mailto:wlyin@caep.cn).

<sup>c</sup> University of Chinese Academy of Sciences, Beijing 100049, P. R. China.

<sup>d</sup> Key Laboratory of Science and Technology on High Energy Laser, China Academy of Engineering Physics, Mianyang 621900, People's Republic of China.

**Table S1** Atomic coordinates, equivalent isotropic displacement parameters and bond valence sums (BVS) for Ba<sub>4</sub>HgAs<sub>2</sub>S<sub>10</sub>.

| Atom | <i>x</i>    | <i>y</i>     | <i>z</i>    | $U_{\text{eq}} (\text{\AA}^2)^a$ | BVS   |
|------|-------------|--------------|-------------|----------------------------------|-------|
| Hg1  | 0.5000      | 0.63849 (3)  | 0.7500      | 0.02033 (6)                      | 1.980 |
| Hg2  | 0.5000      | 1.0000       | 1.0000      | 0.02082 (7)                      | 1.975 |
| Ba1  | 0.68946 (2) | 0.60340 (4)  | 0.70683 (2) | 0.01969 (7)                      | 1.864 |
| Ba2  | 0.56505 (2) | 1.10794 (3)  | 0.64831 (2) | 0.01416 (6)                      | 1.955 |
| Ba3  | 0.56452 (2) | 0.52898 (3)  | 0.89960 (2) | 0.01489 (6)                      | 1.936 |
| Ba4  | 0.69072 (2) | 1.00141 (3)  | 0.95371 (2) | 0.01642 (7)                      | 1.958 |
| As1  | 0.64408 (2) | 1.08286 (6)  | 0.79858 (2) | 0.01109 (8)                      | 5.005 |
| As2  | 0.64423 (2) | 0.52691 (5)  | 0.54873 (2) | 0.01047 (8)                      | 4.985 |
| S1   | 0.55278 (4) | 0.62475 (13) | 0.67082 (3) | 0.01428 (18)                     | 2.035 |
| S2   | 0.65655 (4) | 0.77064 (14) | 0.82631 (3) | 0.0195 (2)                       | 1.931 |
| S3   | 0.55660 (4) | 1.18888 (19) | 0.78361 (4) | 0.0285 (2)                       | 1.806 |
| S4   | 0.69083 (4) | 1.29058 (15) | 0.85035 (4) | 0.0201 (2)                       | 1.966 |
| S5   | 6885.0(4)   | 10957.5(14)  | 7214.3(3)   | 14.45(19)                        | 2.139 |
| S6   | 5537.6(4)   | 10264.6(14)  | 9215.3(3)   | 14.54(18)                        | 2.030 |
| S7   | 6572.5(4)   | 8416.7(14)   | 5740.5(4)   | 20.1(2)                          | 1.760 |
| S8   | 5561.3(4)   | 4252.6(17)   | 5349.7(4)   | 21.9(2)                          | 1.881 |
| S9   | 6894.2(4)   | 3213.0(14)   | 6027.3(3)   | 16.45(18)                        | 2.024 |
| S10  | 6887.2(4)   | 4993.0(13)   | 4719.0(3)   | 13.63(19)                        | 2.110 |

<sup>a</sup>  $U_{\text{eq}}$  is defined as one-third of the trace of the orthogonalized  $U_{ij}$  tensor.

**Table S2** Selected band distances (Å) and band angles (°) for Ba<sub>4</sub>HgAs<sub>2</sub>S<sub>10</sub>.

|                           |            |                       |            |
|---------------------------|------------|-----------------------|------------|
| Hg1—S1 <sup>i</sup>       | 2.3237(8)  | Ba3—S4 <sup>vi</sup>  | 3.4920(10) |
| Hg1—S1                    | 2.3237(8)  | Ba3—S6                | 3.2751(9)  |
| Hg2—S6 <sup>iii</sup>     | 2.3246(8)  | Ba3—S6 <sup>vi</sup>  | 3.3072(9)  |
| Hg2—S6                    | 2.3247(8)  | Ba3—S8 <sup>x</sup>   | 3.4112(9)  |
| Ba1—S1                    | 3.2430(9)  | Ba3—S8 <sup>i</sup>   | 3.2722(10) |
| Ba1—S2                    | 3.2720(9)  | Ba3—S10 <sup>x</sup>  | 3.3620(9)  |
| Ba1—S4 <sup>iv</sup>      | 3.3121(10) | Ba4—S2                | 3.6085(10) |
| Ba1—S5 <sup>iv</sup>      | 3.3083(9)  | Ba4—S4                | 3.1955(10) |
| Ba1—S5 <sup>vi</sup>      | 3.3055(10) | Ba4—S6                | 3.2252(9)  |
| Ba1—S5                    | 3.2071(10) | Ba4—S7 <sup>ii</sup>  | 3.2735(9)  |
| Ba1—S9                    | 3.1841(9)  | Ba4—S9 <sup>v</sup>   | 3.2904(9)  |
| Ba2—S1 <sup>vii</sup>     | 3.4032(9)  | Ba4—S10 <sup>x</sup>  | 3.2724(9)  |
| Ba2—S1                    | 3.1897(9)  | Ba4—S10 <sup>ii</sup> | 3.2633(9)  |
| Ba2—S3 <sup>i</sup>       | 3.2987(10) | Ba4—S10 <sup>v</sup>  | 3.3164(9)  |
| Ba2—S3                    | 3.4367(10) | As1—S2                | 2.1553(10) |
| Ba2—S5                    | 3.3547(9)  | As1—S3                | 2.1402(10) |
| Ba2—S6 <sup>i</sup>       | 3.2631(9)  | As1—S4                | 2.1492(10) |
| Ba2—S7                    | 3.2948(9)  | As1—S5                | 2.1852(9)  |
| Ba2—S8 <sup>vii</sup>     | 3.5104(10) | As2—S7                | 2.1538(10) |
| Ba2—S9 <sup>vii</sup>     | 3.3538(9)  | As2—S8                | 2.1393(10) |
| Ba3—S1 <sup>i</sup>       | 3.2590(9)  | As2—S9                | 2.1579(9)  |
| Ba3—S2                    | 3.1981(9)  | As2—S10               | 2.1847(9)  |
| Ba3—S3 <sup>vi</sup>      | 3.6503(12) |                       |            |
|                           |            |                       |            |
| S1 <sup>i</sup> —Hg1—S1   | 175.61(4)  | S4—As1—S5             | 106.29(4)  |
| S6 <sup>iii</sup> —Hg2—S6 | 180.0      | S7—As2—S9             | 109.45(4)  |
| S2—As1—S5                 | 105.08(4)  | S7—As2—S10            | 105.85(4)  |
| S3—As1—S2                 | 118.63(5)  | S8—As2—S7             | 117.84(4)  |
| S3—As1—S4                 | 111.44(5)  | S8—As2—S9             | 110.97(4)  |
| S3—As1—S5                 | 105.38(4)  | S8—As2—S10            | 105.62(4)  |
| S4—As1—S2                 | 109.07(4)  | S9—As2—S10            | 106.30(4)  |

Symmetry codes: (i)  $-x+1, y, -z+3/2$ ; (ii)  $x, -y+2, z+1/2$ ; (iii)  $-x+1, -y+2, -z+2$ ;  
(iv)  $-x+3/2, y-1/2, -z+3/2$ ; (v)  $-x+3/2, y+1/2, -z+3/2$ ; (vi)  $x, y-1, z$ ; (vii)  $x, y+1, z$ ;  
(viii)  $-x+1, y+1, -z+3/2$ ; (ix)  $-x+1, y-1, -z+3/2$ ; (x)  $x, -y+1, z+1/2$ ; (xi)  $-x+3/2, -y+5/2, -z+2$ ;  
(xii)  $x, -y+2, z-1/2$ ; (xiii)  $x, -y+1, z-1/2$ .

## Synthesis of BaS<sub>3</sub>

The binary material BaS<sub>3</sub> was synthesized by stoichiometric reaction of BaS and S element within a sealed silica tube. The tube was heated to 773 K in 10 h, maintained the temperature for 48 h, and then cooled down to room temperature by shutting off the furnace. In order to enhance the crystallinity and purity, the obtained sample was reground and the heat treatment was repeated. Eventually, yellow powder of BaS<sub>3</sub> was obtained. The measured powder X-ray diffraction (XRD) pattern agrees well with the simulated pattern from the reported single-crystal structure (ICSD #23637).

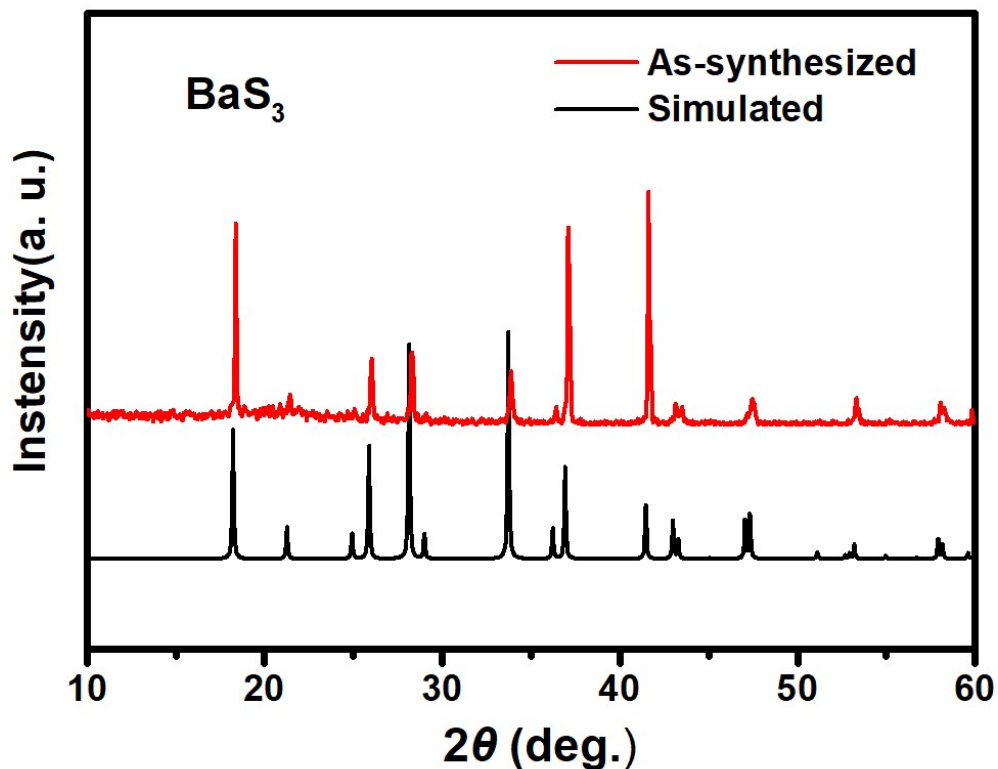

Figure S1. PXRD patterns of BaS<sub>3</sub>.

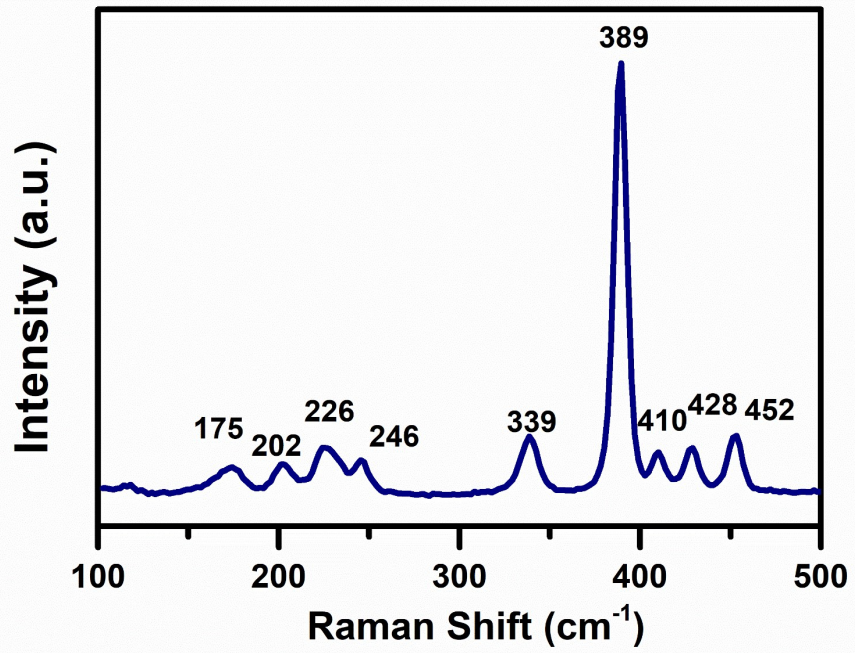

Figure S2. Raman spectrum of Ba<sub>4</sub>HgAs<sub>2</sub>S<sub>10</sub>.

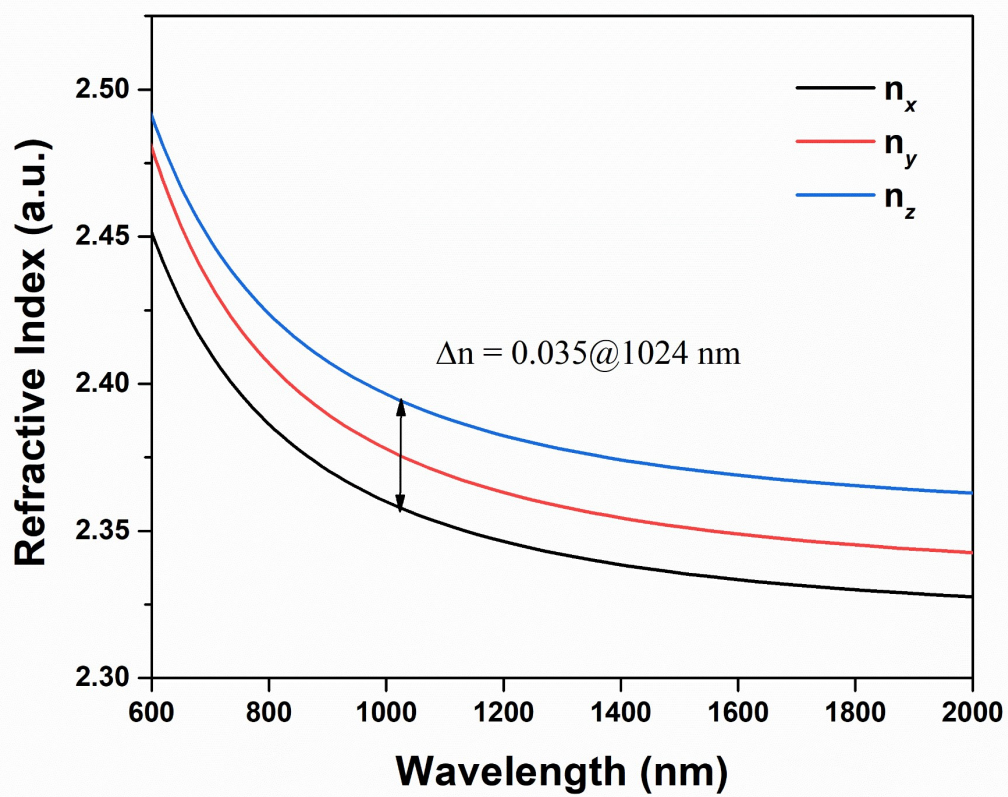

Figure S3. Refractive index dispersion diagrams of Ba<sub>4</sub>HgAs<sub>2</sub>S<sub>10</sub>.
